# Supplementary material for: Survival and neurodevelopmental impairment of outborn preterm infants at 5.5 years of age: an EPIPAGE-2 prospective, matched study using multiple imputation
Source: HighWire-hosted journal article supplement (doi:10.1136/bmjpo-2022-001619), 2022-12-01
Supplement: bmjpo-2022-001619supp001_data_supplement.pdf [file bmjpo-2022-001619supp001_data_supplement.pdf]

**Supplementary Table 1**, Type of variables, model used to predict missing data, and percentages of values missing for each variable included in the imputation model.

| Variables                                         | Type of variable           | Model used to predict missing data | Percentages of missing values among survivors at 5 |
|---------------------------------------------------|----------------------------|------------------------------------|----------------------------------------------------|
| inborn                                            | Binary                     | No missing data                    | 0%                                                 |
| Gestational age                                   | Categorical                | No missing data                    | 0%                                                 |
| <b>Maternal characteristics at birth</b>          |                            |                                    |                                                    |
| Maternal age at birth                             | Categorical (3 categories) | Multinomial regression             | 0%                                                 |
| Primiparity                                       | Binary                     | Logistic regression                | 1%                                                 |
| Maternal born in France                           | Binary                     | Logistic regression                | 1%                                                 |
| Living in a couple relationship                   | Binary                     | Logistic regression                | 5%                                                 |
| Parents' socio-economic status*                   | Categorical (5 categories) | Multinomial regression             | 5%                                                 |
| Maternal level of education                       | Categorical (5 categories) | Multinomial regression             | 6%                                                 |
| <b>Obstetric factors</b>                          |                            |                                    |                                                    |
| Multiple pregnancy                                | Binary                     | No missing data                    | 0%                                                 |
| Infertility treatment                             | Binary                     | Logistic regression                | 1%                                                 |
| Antenatal steroids                                | Binary                     | No missing data                    | 0%                                                 |
| Tocolysis                                         | Binary                     | Logistic regression                | <1%                                                |
| Antenatal administration of magnesium sulphate    | Binary                     | Logistic regression                | 1%                                                 |
| Premature rupture of membranes                    | Binary                     | Logistic regression                | <1%                                                |
| Spontaneous labour                                | Binary                     | Logistic regression                | 3%                                                 |
| Chorioamnionitis                                  | Binary                     | Logistic regression                | 2%                                                 |
| Antepartum haemorrhage                            | Binary                     | Logistic regression                | 1%                                                 |
| Pre-eclampsia                                     | Binary                     | Logistic regression                | 2%                                                 |
| Caesarean                                         | Binary                     | Logistic regression                | 1%                                                 |
| <b>Neonatal factors</b>                           |                            |                                    |                                                    |
| Cephalic presentation                             | Binary                     | Logistic regression                | 1%                                                 |
| Male sex                                          | Binary                     | Logistic regression                | 0%                                                 |
| Small-for-gestational age <sup>†</sup>            | Binary                     | Logistic regression                | 0%                                                 |
| Major congenital malformation                     | Binary                     | No missing data                    | 0%                                                 |
| Surfactant                                        | Binary                     | Logistic regression                | 1%                                                 |
| Severe cerebral lesions                           | Binary                     | Logistic regression                | 1%                                                 |
| Severe bronchopulmonary dysplasia                 | Binary                     | Logistic regression                | 3%                                                 |
| Attempted CPAP in the first 24 hours of life      | Binary                     | Logistic regression                | 1%                                                 |
| Respiratory distress syndrome                     | Binary                     | Logistic regression                | 2%                                                 |
| Cumulative duration of mechanical ventilation     | Continuous                 | Predictive mean matching           | 1%                                                 |
| Severe necrotising enterocolitis                  | Binary                     | Logistic regression                | 1%                                                 |
| Severe retinopathy of prematurity                 | Binary                     | Logistic regression                | 1%                                                 |
| Late onset sepsis                                 | Binary                     | Logistic regression                | 1%                                                 |
| Treatment of patent ductus arteriosus with NSAIDs | Binary                     | Logistic regression                | 2%                                                 |
| Surgical treatment of patent ductus arteriosus    | Binary                     | Logistic regression                | 4%                                                 |
| Breast milk at discharge                          | Categorical (3 categories) | Multinomial regression             | 7%                                                 |
| <b>At 2 years corrected age</b>                   |                            |                                    |                                                    |
| Cerebral palsy                                    | Categorical                | Multinomial regression             | 16%                                                |

|                                  |                               |                     |     |
|----------------------------------|-------------------------------|---------------------|-----|
|                                  | (5 categories)                |                     |     |
| Other abnormal neuro motor signs | Binary                        | Logistic regression | 16% |
| Hearing disabilities             | Categorical<br>(3 categories) | Logistic regression | 18% |

Supplementary Table 1 (Continued)

| Variables                 | Type of variable           | Model used to predict missing data | Percentages of missing values among survivors at 5 |
|---------------------------|----------------------------|------------------------------------|----------------------------------------------------|
| Visual disabilities       | Categorical (5 categories) | Logistic regression                | 22%                                                |
| ASQ Communication score   | Continuous                 | Predictive mean matching           | 17%                                                |
| ASQ Gross motor score     | Continuous                 | Predictive mean matching           | 19%                                                |
| ASQ Fine motor score      | Continuous                 | Predictive mean matching           | 20%                                                |
| ASQ Problem solving score | Continuous                 | Predictive mean matching           | 21%                                                |
| ASQ Personal-social score | Continuous                 | Predictive mean matching           | 20%                                                |
| Small vocabulary stock    | Binary                     | Logistic regression                | 22%                                                |
| <b>At 5½ years</b>        |                            |                                    |                                                    |
| Cerebral Palsy            | Categorical (5 categories) | Multinomial regression             | 29%                                                |
| Hearing disabilities      | Categorical (4 categories) | Multinomial regression             | 31%                                                |
| Visual disabilities       | Categorical (4 categories) | Multinomial regression             | 38%                                                |
| WPPSI-IV FSIQ score       | Continuous                 | Predictive mean matching           | 40%                                                |
| MABC-2 Total score        | Continuous                 | Predictive mean matching           | 40%                                                |
| SDQ total score           | Continuous                 | Predictive mean matching           | 39%                                                |

ASQ=Ages and Stages questionnaire (Squire, 2009); WPPSI-IV=Wechsler Preschool and Primary Scale of Intelligence-Fourth edition (Wechsler, 2014); FSIQ= Full-Scale Intelligence quotient; MABC-2=Movement Assessment Battery for Children- Second Edition (Henderson, 2007); SDQ= Strengths and difficulties questionnaire (Goodman, 1997).

All variables were included as a predictor of all imputation models.

\* Defined as the highest occupational status between occupations of the mother and the father, or mother only if living alone.

† Small-for- gestational age was defined as birth weight less than the 10th percentile for gestational age and sex based on French intrauterine growth curves (Ego, 2016).

**Supplementary Table 2**, Comparison of eligible infants and those missing information about antenatal corticosteroid administration.

|                                                         | Eligible infants |      | Antenatal steroids not available or incomplete data |      | Chi2    |
|---------------------------------------------------------|------------------|------|-----------------------------------------------------|------|---------|
|                                                         | n=3355           |      | n=102                                               |      | p-value |
| <b>Gestational age, week</b>                            |                  |      |                                                     |      |         |
| 24                                                      | 161/3355         | 4.8  | 6/102                                               | 5.9  | 0.36    |
| 25                                                      | 273/3355         | 8.1  | 9/102                                               | 8.8  |         |
| 26                                                      | 357/3355         | 10.6 | 13/102                                              | 12.7 |         |
| 27                                                      | 338/3355         | 10.1 | 16/102                                              | 15.7 |         |
| 28                                                      | 408/3355         | 12.2 | 8/102                                               | 7.8  |         |
| 29                                                      | 452/3355         | 13.5 | 8/102                                               | 7.8  |         |
| 30                                                      | 609/3355         | 18.2 | 19/102                                              | 18.6 |         |
| 31                                                      | 757/3355         | 22.6 | 23/102                                              | 22.5 |         |
| <b>Maternal characteristics at birth</b>                |                  |      |                                                     |      |         |
| <b>Maternal age</b>                                     |                  |      |                                                     |      |         |
| <25 years                                               | 627/3353         | 18.7 | 17/102                                              | 16.7 | 0.87    |
| 25-34 years                                             | 1992/3353        | 59.4 | 62/102                                              | 60.8 |         |
| ≥35 years                                               | 734/3353         | 21.9 | 23/102                                              | 22.5 |         |
| <b>Mother born in France</b>                            | 2485/3271        | 76.0 | 76/95                                               | 80.0 | 0.87    |
| <b>Parents' socio-economic status*</b>                  |                  |      |                                                     |      |         |
| Professional                                            | 688/3126         | 22.0 | 16/83                                               | 19.3 | 0.86    |
| Intermediate                                            | 639/3126         | 20.4 | 19/83                                               | 22.9 |         |
| Administrative, public service, self-employed, students | 844/3126         | 27.0 | 22/83                                               | 26.5 |         |
| Shop assistants, service workers                        | 462/3126         | 14.8 | 10/83                                               | 12.0 |         |
| Manual workers                                          | 397/3126         | 12.7 | 12/83                                               | 14.5 |         |
| Unemployed                                              | 96/3126          | 3.1  | 4/83                                                | 4.8  |         |
| <b>Obstetric factors</b>                                |                  |      |                                                     |      |         |
| <b>Primiparous</b>                                      | 1810/3324        | 54.5 | 47/97                                               | 48.5 | 0.50    |
| <b>Infertility treatment</b>                            | 563/3312         | 17.0 | 17/93                                               | 18.3 | 0.75    |
| <b>Antenatal steroids</b>                               |                  |      |                                                     |      |         |
| No                                                      | 581/3355         | 17.3 | -                                                   | -    | 0.026   |
| Incomplete course                                       | 584/3355         | 17.4 | -                                                   | -    |         |
| Complete course                                         | 2190/3355        | 65.3 | -                                                   | -    |         |
| <b>Tocolysis</b>                                        | 1881/3342        | 56.3 | 41/92                                               | 44.6 | 0.32    |
| <b>Antenatal administration of magnesium sulphate</b>   | 272/3314         | 8.2  | 5/93                                                | 5.4  | 0.37    |
| <b>Premature rupture of membranes</b>                   | 1040/3317        | 31.4 | 26/96                                               | 27.1 | 0.69    |
| <b>Spontaneous labour</b>                               | 1683/3261        | 51.6 | 44/89                                               | 49.4 | 0.10    |
| <b>Chorioamnionitis</b>                                 | 112/3289         | 3.4  | 6/90                                                | 6.7  | 0.85    |
| <b>Antepartum haemorrhage</b>                           | 203/3319         | 6.1  | 5/89                                                | 5.6  | 0.75    |
| <b>Pre-eclampsia</b>                                    | 564/3275         | 17.2 | 17/92                                               | 18.5 | 0.65    |
| <b>Caesarean section</b>                                | 2151/3332        | 64.6 | 63/101                                              | 62.4 | 0.76    |
| <b>Multiple pregnancy</b>                               | 1102/3355        | 32.8 | 35/102                                              | 34.3 |         |
| <b>Neonatal factors</b>                                 |                  |      |                                                     |      |         |
| <b>Cephalic presentation</b>                            | 2063/3243        | 63.6 | 65/94                                               | 69.1 | 0.27    |
| <b>Male sex</b>                                         | 1768/3355        | 52.7 | 62/102                                              | 60.8 | 0.11    |
| <b>Small-for-gestational age†</b>                       | 1156/3352        | 34.5 | 34/102                                              | 33.3 | 0.81    |

\* Defined as the highest occupational status of the mother and father, or mother only if living alone.

† Small-for-gestational age was defined as birth weight less than the 10th percentile for gestational age and sex based on French intrauterine "EPOPé" growth curves (Ego 2016).

**Supplementary Table 3**, Comparison between matched and unmatched inborn infants.

|                                                         | Matched Inborn<br>n=1235 |      | Unmatched Inborn<br>n=1622 |      | p-value |  |
|---------------------------------------------------------|--------------------------|------|----------------------------|------|---------|--|
| <b>Gestational age, week</b>                            |                          |      |                            |      |         |  |
| 24                                                      | 66/1235                  | 5.3  | 64/1622                    | 3.9  | <.0001  |  |
| 25                                                      | 91/1235                  | 7.4  | 142/1622                   | 8.8  |         |  |
| 26                                                      | 105/1235                 | 8.5  | 203/1622                   | 12.5 |         |  |
| 27                                                      | 99/1235                  | 8.0  | 198/1622                   | 12.2 |         |  |
| 28                                                      | 121/1235                 | 9.8  | 240/1622                   | 14.8 |         |  |
| 29                                                      | 108/1235                 | 8.7  | 293/1622                   | 18.1 |         |  |
| 30                                                      | 235/1235                 | 19.0 | 293/1622                   | 18.1 |         |  |
| 31                                                      | 410/1235                 | 33.2 | 189/1622                   | 11.7 |         |  |
| <b>Maternal characteristics at birth</b>                |                          |      |                            |      |         |  |
| <b>Maternal age</b>                                     |                          |      |                            |      |         |  |
| <25 years                                               | 224/1234                 | 18.2 | 283/1621                   | 17.5 | 0.35    |  |
| 25-34 years                                             | 743/1234                 | 60.2 | 950/1621                   | 58.6 |         |  |
| ≥35 years                                               | 267/1234                 | 21.6 | 388/1621                   | 23.9 |         |  |
| <b>Mother born in France</b>                            | 888/1205                 | 73.7 | 1204/1589                  | 75.8 | 0.30    |  |
| <b>Parents' socio-economic status*</b>                  |                          |      |                            |      |         |  |
| Professional                                            | 241/1148                 | 21.0 | 370/1533                   | 24.1 | 0.075   |  |
| Intermediate                                            | 243/1148                 | 21.2 | 305/1533                   | 19.9 |         |  |
| Administrative, public service, self-employed, students | 315/1148                 | 27.4 | 418/1533                   | 27.3 |         |  |
| Shop assistants, service workers                        | 163/1148                 | 14.2 | 211/1533                   | 13.8 |         |  |
| Manual workers                                          | 142/1148                 | 12.4 | 196/1533                   | 12.8 |         |  |
| Unemployed                                              | 44/1148                  | 3.8  | 33/1533                    | 2.2  |         |  |
| <b>Obstetric factors</b>                                |                          |      |                            |      |         |  |
| <b>Primiparous</b>                                      | 658/1223                 | 53.8 | 897/1612                   | 55.6 | 0.32    |  |
| <b>Multiple pregnancy</b>                               | 399/1235                 | 32.3 | 574/1622                   | 35.4 | 0.085   |  |
| <b>Infertility treatment</b>                            | 198/1221                 | 16.2 | 326/1605                   | 20.3 | 0.006   |  |
| <b>Antenatal steroids</b>                               |                          |      |                            |      |         |  |
| No                                                      | 337/1235                 | 27.3 | 0/1622                     | 0.0  | 0.006   |  |
| Incomplete course                                       | 406/1235                 | 32.9 | 47/1622                    | 2.9  |         |  |
| Complete course                                         | 492/1235                 | 39.8 | 1575/1622                  | 97.1 |         |  |
| <b>Tocolysis</b>                                        | 651/1231                 | 52.9 | 1006/1616                  | 62.3 | <0.001  |  |
| <b>Antenatal administration of magnesium sulphate</b>   | 104/1216                 | 8.6  | 162/1609                   | 10.1 | 0.17    |  |
| <b>Premature rupture of membranes</b>                   | 359/1222                 | 29.4 | 593/1615                   | 36.7 | <0.001  |  |
| <b>Spontaneous labour</b>                               | 614/1195                 | 51.4 | 755/1587                   | 47.6 | 0.047   |  |
| <b>Chorioamnionitis</b>                                 | 44/1207                  | 3.6  | 59/1599                    | 3.7  | 0.95    |  |
| <b>Antepartum haemorrhage</b>                           | 80/1223                  | 6.5  | 70/1606                    | 4.4  | 0.01    |  |
| <b>Pre-eclampsia</b>                                    | 229/1207                 | 19.0 | 284/1585                   | 17.9 | 0.48    |  |
| <b>Caesarean</b>                                        | 781/1229                 | 63.5 | 1110/1619                  | 68.6 | 0.005   |  |
| <b>Neonatal factors</b>                                 |                          |      |                            |      |         |  |
| <b>Cephalic presentation</b>                            | 779/1202                 | 64.8 | 971/1579                   | 61.5 | 0.073   |  |
| <b>Male sex</b>                                         | 651/1235                 | 52.7 | 852/1622                   | 52.5 | 0.92    |  |
| <b>Small-for-gestational age‡</b>                       | 418/1235                 | 33.8 | 614/1621                   | 37.9 | 0.026   |  |

\* Defined as the highest occupational status of the mother and father, or mother only if living alone.

‡ Small-for-gestational age was defined as birth weight less than the 10th percentile for gestational age and sex based on French intrauterine “EPOPE” growth curves (Ego 2016).

**Supplementary Table 4:** Survival without moderate-severe impairment at age 5½ years in a matched cohort of children from EPIPAGE-2 according to gestational age at birth.

|                                                                                  | Matched cohort 1:n (up to 4) <sup>a</sup> |      |         |      | Inborn vs outborn                      |         |                                        |         |
|----------------------------------------------------------------------------------|-------------------------------------------|------|---------|------|----------------------------------------|---------|----------------------------------------|---------|
|                                                                                  | Inborn                                    |      | Outborn |      | Unadjusted OR<br>(95% CI) <sup>b</sup> | p-value | Adjusted OR<br>(95% CI) <sup>b,c</sup> | p-value |
|                                                                                  | n/N                                       | %    | n/N     | %    |                                        |         |                                        |         |
| <b>Survival without severe or moderate disabilities at 5.5 years<sup>c</sup></b> |                                           |      |         |      |                                        |         |                                        |         |
| <b>24 weeks</b>                                                                  | 9/66                                      | 14.0 | 3/31    | 11.5 | 1.27 (0.29-5.46)                       | 0.75    | <i>Did not converge</i>                |         |
| <b>25 weeks</b>                                                                  | 36/91                                     | 38.3 | 13/40   | 34.0 | 1.21 (0.49-2.95)                       | 0.68    | 0.91 (0.27-3.08)                       | 0.89    |
| <b>26 weeks</b>                                                                  | 58/105                                    | 59.0 | 19/49   | 39.0 | 2.25 (1.01-5.06)                       | 0.05    | 2.88 (1.01-8.24)                       | 0.048   |
| <b>27 weeks</b>                                                                  | 61/99                                     | 65.1 | 20/41   | 48.8 | 1.96 (0.87-4.44)                       | 0.11    | 2.50 (0.77-8.12)                       | 0.13    |
| <b>28 weeks</b>                                                                  | 90/121                                    | 72.9 | 32/47   | 68.9 | 1.22 (0.53-2.80)                       | 0.65    | 1.42 (0.45-4.52)                       | 0.55    |
| <b>29 weeks</b>                                                                  | 86/108                                    | 77.0 | 37/51   | 73.0 | 1.23 (0.48-3.18)                       | 0.67    | 1.29 (0.34-4.92)                       | 0.71    |
| <b>30 weeks</b>                                                                  | 185/235                                   | 77.5 | 66/81   | 81.7 | 0.77 (0.37-1.61)                       | 0.49    | 0.78 (0.34-1.80)                       | 0.55    |
| <b>31 weeks</b>                                                                  | 348/410                                   | 83.8 | 130/158 | 82.8 | 1.07 (0.57-2.03)                       | 0.82    | 1.03 (0.51-2.12)                       | 0.93    |

<sup>a</sup> Result after multiple imputation for missing data and weighted for the variable matching ratio. Matching were performed in each subgroup.

<sup>b</sup> OR were calculated using conditional logistic regression.

<sup>c</sup> OR adjusted for maternal age, mother born in France, parents' socio-economic status, primiparous, infertility treatment, multiple pregnancy, tocolysis, antenatal administration of magnesium sulphate, context of preterm birth, caesarean section, cephalic presentation, small-for-gestational age and sex.

<sup>d</sup> Severe or moderate cerebral palsy (Gross Motor Function Classification System level-2/5), visions (bilateral binocular visual acuity < 3.2/10), hearing (uni-bilateral hearing loss > 40dB not corrected or partially corrected with hearing aid), and full-scale intelligence quotient < 2 standard deviations below the mean of the reference sample born at term (See Pierrat 5 ans).
